# Supplementary material for: Low temperature thermoelectric and magnetoresistive properties of Tl2Cu3FeQ4(Q = S, Se, Te)
Source: Royal Society of Chemistry journal article supplement (doi:10.1039/c8qi00058a), 2018-01-01
Supplement: c8qi00058a1.pdf [file c8qi00058a1.pdf]

## Low temperature thermoelectric and magnetoresistive properties of $Tl_2Cu_3FeQ_4$ ( $Q= S, Se, Te$ )

Vijayakumar Sajitha Aswathy, Cheriyeath Raj Sankar\*

Materials Science and Technology Division and Academy of Scientific and Innovative Research (AcSIR), CSIR- National Institute for Interdisciplinary Science and Technology (CSIR-NIIST), Trivandrum-695 019, India

Corresponding Author: \* Email: [rajsankar@niist.res.in](mailto:rajsankar@niist.res.in)

### Supporting information

#### Crystallographic details (Rietveld method) of $Tl_2Cu_3FeQ_4$ ( $Q= S, Se, Te$ )

Table S1: Crystallographic information

|                               | $Tl_2Cu_3FeS_4$ | $Tl_2Cu_3FeSe_4$ | $Tl_2Cu_3FeTe_4$ |
|-------------------------------|-----------------|------------------|------------------|
| $a=b$ (Å)                     | 3.8650 (1)      | 3.9688 (1)       | 4.1289 (1)       |
| $c$ (Å)                       | 13.1684 (2)     | 13.6914 (3)      | 14.7629 (1)      |
| Cell Volume (Å <sup>3</sup> ) | 196.71 (1)      | 215.66 (1)       | 251.68 (1)       |
| Symmetry                      | tetragonal      | tetragonal       | Tetragonal       |
| Space group                   | <i>I 4/mmm</i>  | <i>I 4/mmm</i>   | <i>I 4/mmm</i>   |
| wRp (%)                       | 7.24            | 6.66             | 7.63             |
| Rp (%)                        | 5.28            | 4.93             | 5.84             |
| $\chi^2$                      | 1.764           | 1.706            | 1.492            |

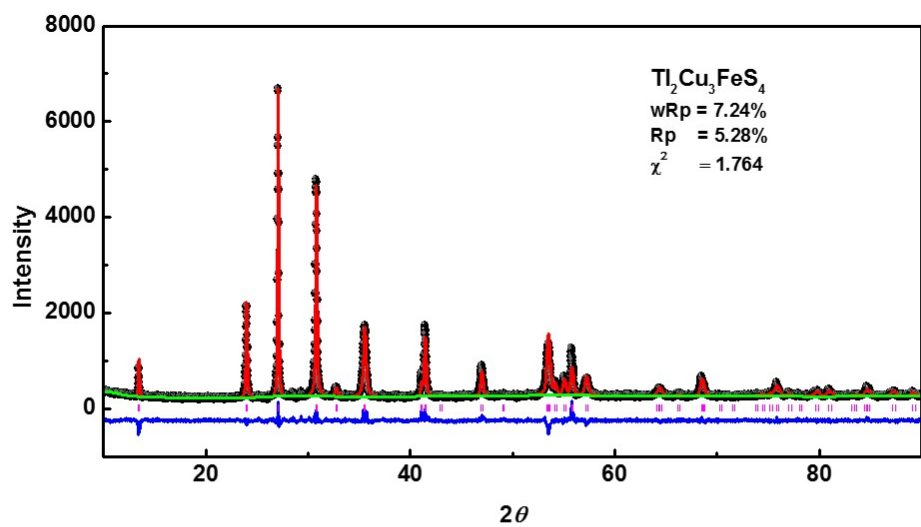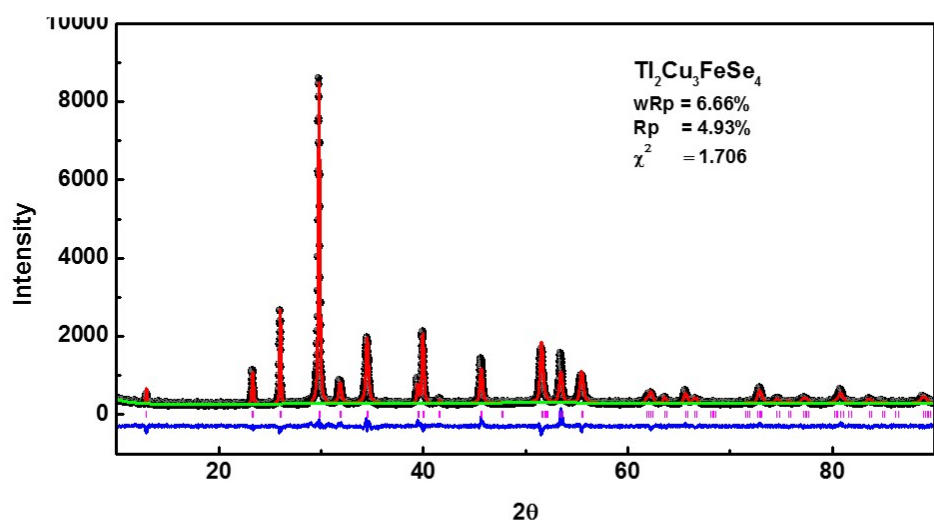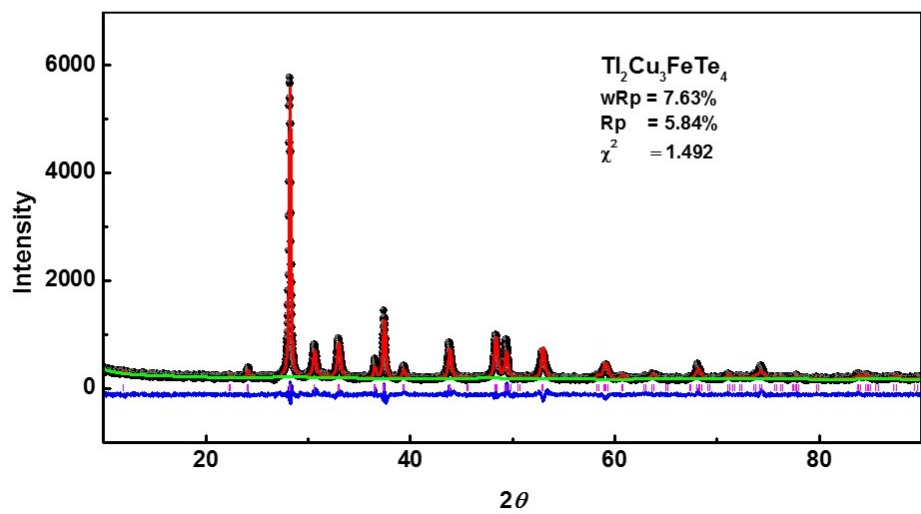

Figure S1: Rietveld fit of the powder XRD patterns for the three compositions as labelled. The XRD of the sulfide sample contains some minor peaks within the region  $2\theta = 27$  to 29 degrees, corresponding to 100% peaks of  $TlCuS_2$  and  $CuFeS_2$  respectively.

Table S2: Atomic coordinates

| Tl <sub>2</sub> Cu <sub>3</sub> FeS <sub>4</sub>  |         |                   |      |                  |
|---------------------------------------------------|---------|-------------------|------|------------------|
| Atom                                              | Wyckoff | $x, y, z$         | SOF  | U <sub>iso</sub> |
| Tl1                                               | 2a      | 0.0, 0.0, 0.0     | 1.0  | 0.0250           |
| Cu1                                               | 4d      | 0.0, 0.5, 0.25    | 0.75 | 0.0055           |
| Fe1                                               | 4d      | 0.0, 0.5, 0.25    | 0.25 | 0.0058           |
| S1                                                | 4e      | 0.0, 0.0, 0.35133 | 1.0  | 0.0009           |
| Tl <sub>2</sub> Cu <sub>3</sub> FeSe <sub>4</sub> |         |                   |      |                  |
| Atom                                              | Wyckoff | $x, y, z$         | SOF  | U <sub>iso</sub> |
| Tl1                                               | 2a      | 0.0, 0.0, 0.0     | 1.0  | 0.0149           |
| Cu1                                               | 4d      | 0.0, 0.5, 0.25    | 0.75 | 0.0135           |
| Fe1                                               | 4d      | 0.0, 0.5, 0.25    | 0.25 | 0.0373           |
| Se1                                               | 4e      | 0.0, 0.0, 0.35763 | 1.0  | 0.0132           |
| Tl <sub>2</sub> Cu <sub>3</sub> FeTe <sub>4</sub> |         |                   |      |                  |
| Atom                                              | Wyckoff | $x, y, z$         | SOF  | U <sub>iso</sub> |
| Tl1                                               | 2a      | 0.0, 0.0, 0.0     | 1.0  | 0.0011           |
| Cu1                                               | 4d      | 0.0, 0.5, 0.25    | 0.75 | 0.0091           |
| Fe1                                               | 4d      | 0.0, 0.5, 0.25    | 0.25 | 0.0091           |
| Te1                                               | 4e      | 0.0, 0.0, 0.36194 | 1.0  | 0.0003           |

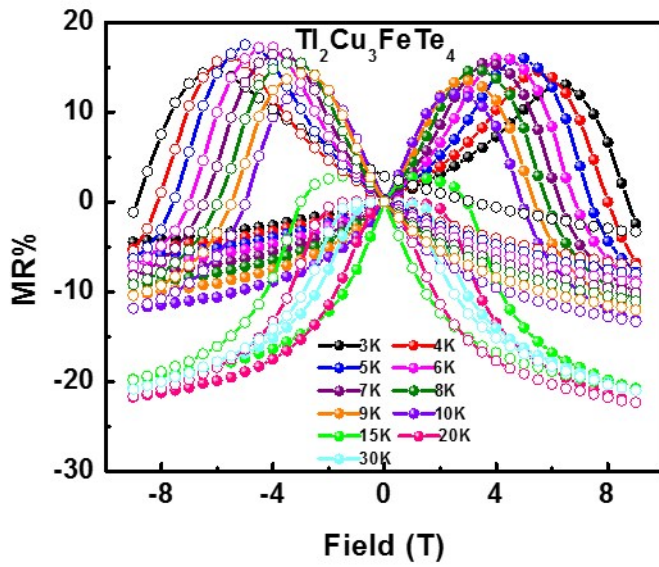

Figure S2: Magnetoresistance of the telluride measured at various temperatures. Closed symbols represent field sweep from -9 to +9 T and open symbols represent +9T to -9T, for every 0.5 T steps.
